# Supplementary material
Source: MDPI journal article supplement (https://www.mdpi.com/2073-4344/12/12/1528)
Supplement: s1 [file s1]

# Design of Bimetallic PtFe-Based Reduced Graphene Oxide as Efficient Catalyst for Oxidation Reduction Reaction

Bathinapatla Sravani<sup>1</sup>, Yenugu Veera Manohara Reddy<sup>2</sup>, Jong Pil Park<sup>3</sup>, and Manthrapudi Venu<sup>4\*</sup>,  
Loka Subramanyam Sarma<sup>1 \*</sup>

<sup>1</sup>Nanoelectrochemistry Laboratory, Department of Chemistry, Yogi Vemana University,  
Kadapa – 516 005, Andhra Pradesh, India.

## Supporting information:

### Experimental Section

#### *Synthesis of Materials*

***Synthesis of graphene oxide (GO).*** For the synthesis of GO we used modified Hummers method [11]. Previous reports were used to adjust the detailed technique for GO production [12]. Pomegranate peel aqueous extract (PPAE) was employed in the GO production procedure for neutralization [12,13]. After centrifugation, the brown GO solid was dried at 50 °C overnight and used for further study.

#### ***Synthesis of PtFe/RGO and Pt/RGO***

The polyol technique was used to make PtFe/RGO nanoparticles by reducing Pt<sup>4+</sup>, Fe<sup>3+</sup>, and the GO mixture at the same time. For ORR activity comparison, chemically reduced graphene oxide-supported platinum nanoparticles (Pt/RGO) were also made. In a round bottomed flask, 80 mg of GO was suspended in ethylene glycol for 30 minutes before being ultrasonicated. Later, under continuous ultrasonication, 40 mg H<sub>2</sub>PtCl<sub>6</sub>.6H<sub>2</sub>O and 64 mg Fe(NO<sub>3</sub>)<sub>3</sub>.9H<sub>2</sub>O were added to this suspension, and the pH was adjusted to 11. On reduced graphene oxide, the weight of metal precursor was determined to yield 10% Pt + 10% Fe (RGO). 2 mg sodium borohydride was added to this mixture, and the complete reaction mixture was refluxed at 150 °C for 3 hours to allow simultaneous reduction of Pt<sup>4+</sup> and Fe<sup>3+</sup> ions, as well as GO, to create Pt nanoparticles on reduced graphene oxide (PtFe/RGO). The reaction mixture was allowed to cool to room temperature before being rinsed with distilled

water numerous times until it reached a pH of neutral. Water/methanol combination (50:50 v/v) was used to wash the PtFe/RGO product produced. The obtained product was dried hot air oven at 60°C overnight. Similar procedure was utilized for the fabrication of Pt/RGO and Fe/RGO as described for PtFe/RGO nanoparticles.

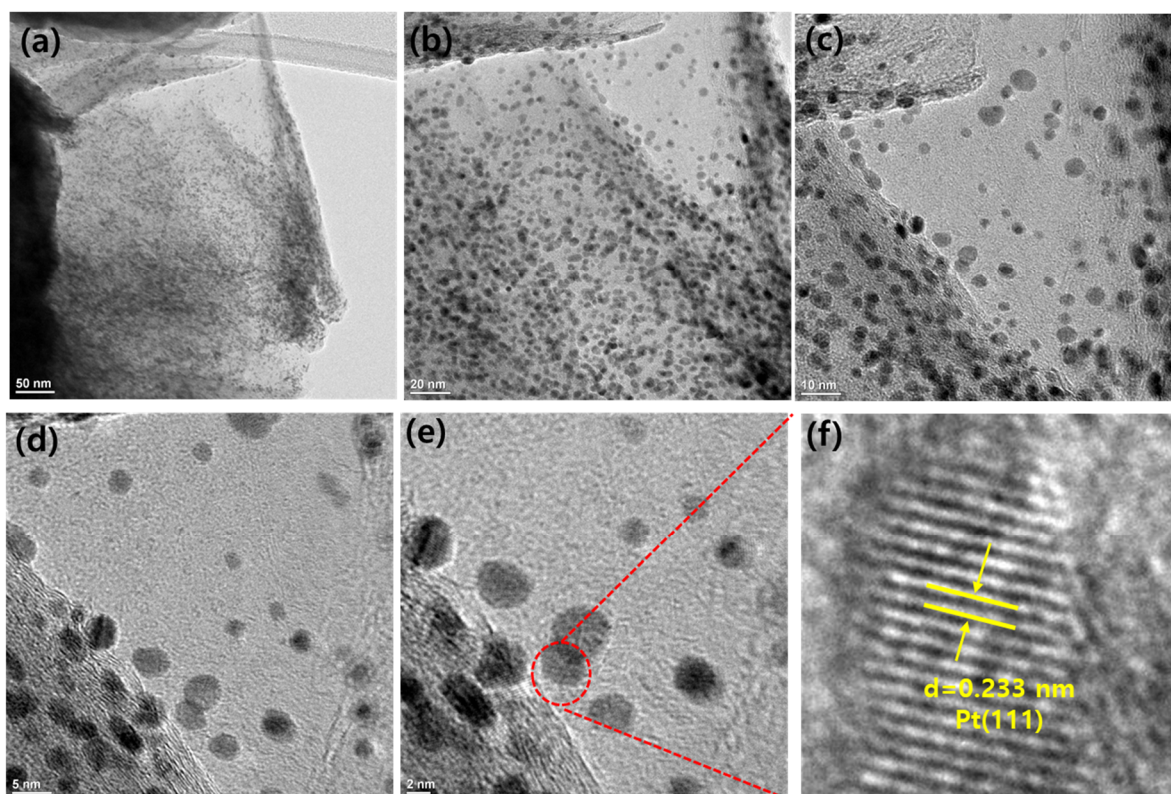

**Figure S1.** Transmiosision electron microscopy TEM and high-resolution transmission electron microscopy (HRTEM) images of Pt/RGO metal nanoparticles.

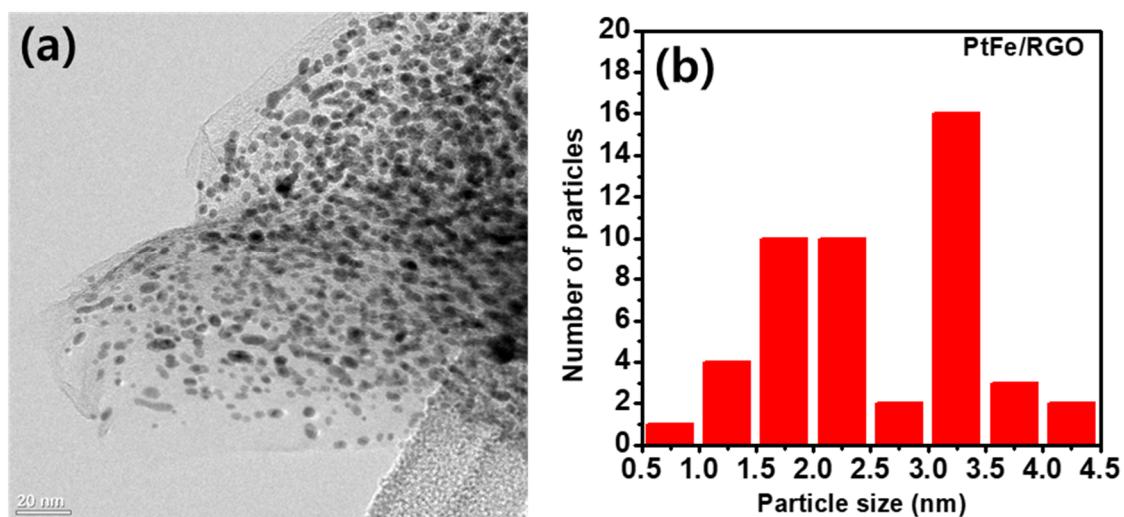

**Figure S2.** TEM images of PtFe/RGO and size distribution of PtFe/RGO catalyst.

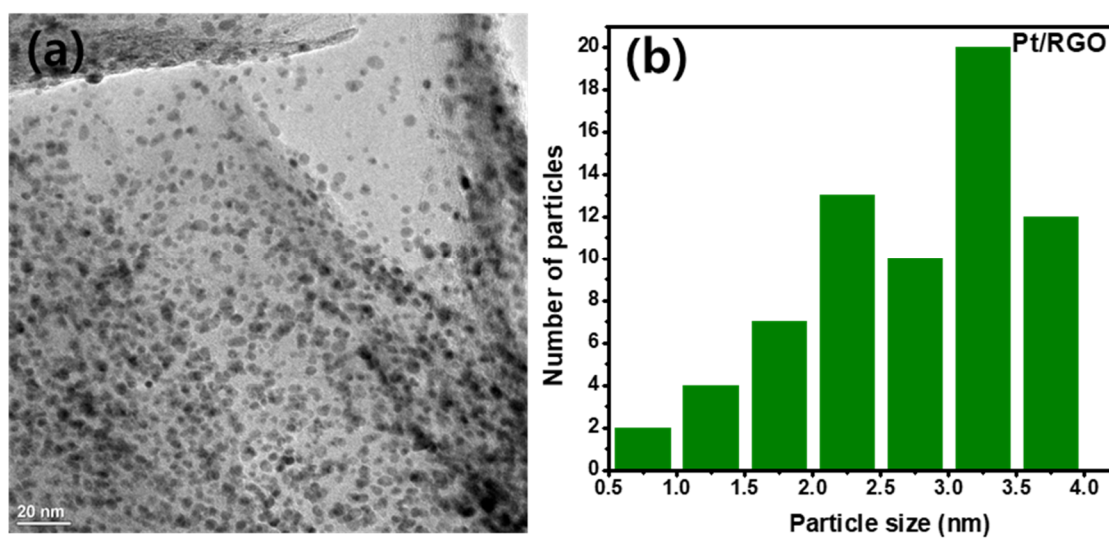

**Figure S3.** TEM images of Pt/RGO and size distribution of Pt/RGO catalyst.

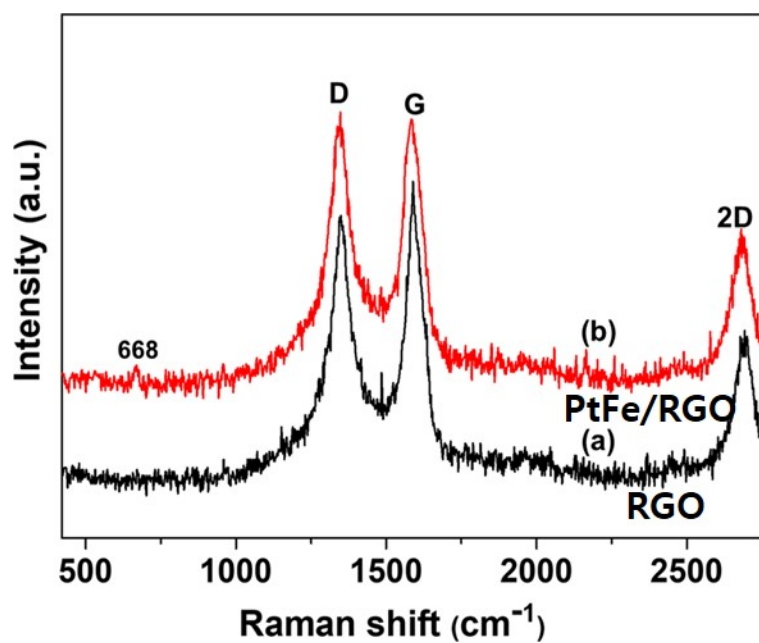

**Figure S4.** (a, b) Raman spectra of RGO, and PtFe/RGO composite.

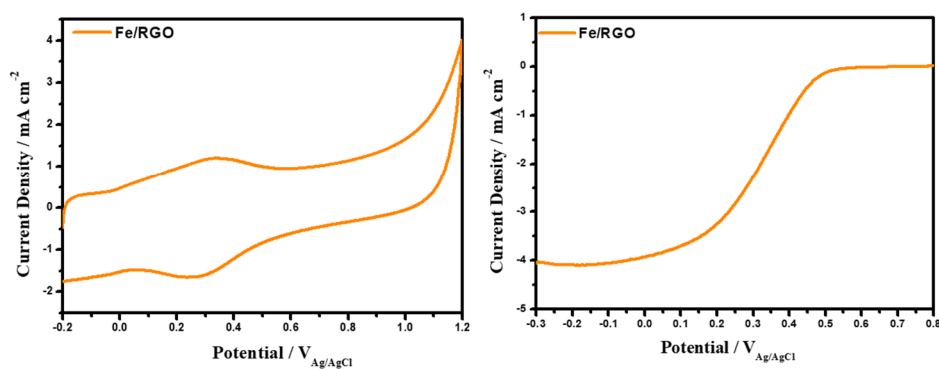

**Figure S5.** Cyclic voltammetry (CV) and oxygen reduction reaction (ORR) polarization curves of Fe/RGO.

| <b>Catalyst</b>                        | <b>Electrolyte</b>                     | <b>ECSA<br/>(m<sup>2</sup>/g)</b> | <b>E<sub>1/2</sub><br/>(V vs<br/>Ag/AgCl)</b> | <b>Mass<br/>activity<br/>J<br/>(mA/cm<sup>2</sup>)</b> | <b>Reference</b> |
|----------------------------------------|----------------------------------------|-----------------------------------|-----------------------------------------------|--------------------------------------------------------|------------------|
| PtFe/RGO                               | 0.5M<br>H <sub>2</sub> SO <sub>4</sub> | 39.89                             | 0.503                                         | 4.85                                                   | This work        |
| Pt/RGO                                 | 0.5M<br>H <sub>2</sub> SO <sub>4</sub> | 33.52                             | 0.336                                         | 4.76                                                   | This work        |
| Fe/RGO                                 | 0.5M<br>H <sub>2</sub> SO <sub>4</sub> | 15.1                              | 0.352                                         | 4.08                                                   | This work        |
| Pt <sub>30</sub> Fe <sub>70</sub> /OMC | 0.5M<br>H <sub>2</sub> SO <sub>4</sub> | --                                | 0.42                                          | 3.7                                                    | 42               |
| Pt-Ni/graphene                         | 0.5M<br>H <sub>2</sub> SO <sub>4</sub> | 32.0                              | 0.5                                           | --                                                     | 43               |

Table S1. ORR activity comparison table of Pt and Fe based ORR catalysts.
